# Supplementary material
Source: MDPI journal article supplement (https://www.mdpi.com/2077-1312/11/1/88)
Supplement: s1 [file s1]

**Supplementary Materials:**

# **Ecosystem variability along the estuarine salinity gradient: A case study of Hooghly River estuary, West Bengal, India**

**Diwakar Prakash<sup>1</sup>, Chandra Bhushan Tiwary<sup>2</sup> and Ram Kumar<sup>1,\*</sup>**

<sup>1</sup> Ecosystem Ecology Research Unit, Department of Environmental Science, School of Earth, Biological and Environmental Sciences, Central University of South Bihar, SH-7, Gaya-Panchanpur Rd, Fatehpur, Gaya-Bihar 824326, India

<sup>2</sup> Department of Zoology, Vidya Bhavan Mahila Mahavidyalay, Siwan, Bihar 841226, India

\* Correspondence: ramkumar@cub.ac.in

**Supplementary Figure S1:** 1.2% Agarose gel showing single 1500 bp of 16S rDNA amplicon. Lane 1: 100bp DNA ladder; Lane 2: 16S rDNA amplicon of (A) BRK2, (B) DKS and (C) GS1 strains.

**Supplementary Figure S1:**

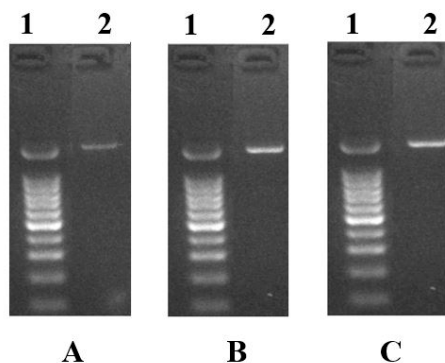

## **Supplementary Tables**

**Supplementary Table S1:** Consensus Sequence of the three strains BRK2, DKS and GS1 characterized, their National Center for Biotechnology Information (NCBI) accession numbers and origin.

**Supplementary Table S2:** Physiochemical and biological parameters at six selected stations (BRK, DK2S, KDM, KDP, KCB, GS) in Hooghly River estuary.

**Supplementary Table S3:** Phytoplankton species recorded at six selected sampling stations in HRE during Oct 2017, Feb 2018 and Jun 2018.

**Supplementary Table S4:** Zooplankton taxa recorded at six selected sampling stations in HRE during Oct 2017, Feb 2018 and Jun 2018.

**Supplementary Table S5:** Zooplankton species/group identified for the present study, propensity of their feeding and relevant references.

**Supplementary Table S6:** Pairwise Pearson correlation matrix between total zooplankton, major groups (Rotifera, Copepoda, Cladocera), with biotic (bacterial density, Chl *a*) and abiotic parameters (pH, EC, temperature, salinity, DO, total hardness, nitrate, phosphate, potassium, sodium and calcium).

**Supplementary Table S1:**

| Sample No 1        |              | Consensus Sequence of Strain BRK2 (1284bp)                                                                                                                                                                                                                                                                                                                                                                                                                                                                                                                                                                                                                                                                                                                                                                                                                                                                                                                                                                                                                                                                                                                                                                                                                                                                                                                                                                                                                                                                                                                                        |
|--------------------|--------------|-----------------------------------------------------------------------------------------------------------------------------------------------------------------------------------------------------------------------------------------------------------------------------------------------------------------------------------------------------------------------------------------------------------------------------------------------------------------------------------------------------------------------------------------------------------------------------------------------------------------------------------------------------------------------------------------------------------------------------------------------------------------------------------------------------------------------------------------------------------------------------------------------------------------------------------------------------------------------------------------------------------------------------------------------------------------------------------------------------------------------------------------------------------------------------------------------------------------------------------------------------------------------------------------------------------------------------------------------------------------------------------------------------------------------------------------------------------------------------------------------------------------------------------------------------------------------------------|
| Sample location    | Barrackpore  | GCGCCTTGGGTTCCCTCAGCACGTCTACCGGCTACACTAGGTAAGTTGTCAGGGCACGGGTCACCAAGGGGACGA<br>TGTGTAGCCGGCTGAGAGGGAGATCGACCACAATGTGACAGTGACACGGCCAGACTCTCCGGGAGGCAGCAGTA<br>GGGAATCTTTCTGCAATGGACGAAAGTCTGACGGAGCATCGCCGCTGAGTGATAAAATTTTCGGATCGTAAAGCTCT<br>GTTGTTAGGGGAAGAACAAAGTTCCGTTTCAATAGGGCGGTACCTTGACGGTACCTAACAGAAAGCCACGGCTAACTA<br>CGTGCCAGCAGCCGGTAATACGTAGGTGGCAAGCGTTGTCGGGAATTATTGGGCGTAAAGGGCTCGCAGGCGGTT<br>TTTTAAGTCTGATGTGAAAACCCCGGCTCAACCGGGGAGGGTCATTGAAACTGGGGAACCTGAGTGCAGAAGAGG<br>AGAGTGGAATTCACGTGTAGCGGTGAAATGCGTAGAGATGTGGAGGAACACCACTGGCGAAGGCGACTCTCTGGT<br>CTGTAACGACGCTGAGGAGCGAAAGCGTGGGGAGCGAACAGGATTAGATACCCTGGTAGTCCACGCCGTAAACGA<br>TGAGTGCTAAGTGTTAGGGGTTTCCGCCCTTAGTGCTGCAGCTAACGCATTAAGCACTCCGCTGGGGAGTACGGT<br>CGCAAGACTGAAACTCAAAGGAATTGACGGGGGCCGACAAAGCGGTGGAGCATGTGTTTAATTGAAGCAACGC<br>GAAGAACCTTACCAGGTCTTGACATCTCTGACAATCTAGAGATAGGACGTCCCTTCGGGGGCAGAGTGACAGGT<br>GGTGCATGGTTGTCGTAGCTCTGTGTCGTAGATGTTGGGTTAAGTCCCGCAACGAGCGCAACCTTGATCTTAGTTG<br>CCAGCATTAGTTGGGCACTCTAAGGTGACTGCCGGGTGACAAACCGGAGGAAGGTGGGGATGACGTCAAATCATCA<br>TGCCCTTATGACCTGGGCTACACAGTGCTACAATGGACAGAAACAAAGGGGCAGCGAAACCGGGAGGTTAAGCCAA<br>TCCCAAAATCTGTTCTCAGTTTCGAGTCGACGTGCGCAACTCGACTGCTGAAGCTGAATCGTAGTAATCGCGATCAC<br>ATGCCCCGGGAGTACTTCCCGGGCTTGACACGACGCGCGGTGCGAGCACGAGAGTGTGTAACAGCCGAATCGG<br>TGAAGGAAGCTTTTAGGAGCCAACCGCCGAAGTGGGACAGATGTTGGGGT                                                                                                                                                                                                            |
| Sample code        | BRK2         |                                                                                                                                                                                                                                                                                                                                                                                                                                                                                                                                                                                                                                                                                                                                                                                                                                                                                                                                                                                                                                                                                                                                                                                                                                                                                                                                                                                                                                                                                                                                                                                   |
| Sample description | River        |                                                                                                                                                                                                                                                                                                                                                                                                                                                                                                                                                                                                                                                                                                                                                                                                                                                                                                                                                                                                                                                                                                                                                                                                                                                                                                                                                                                                                                                                                                                                                                                   |
| NCBI Accession No. | ON834463     |                                                                                                                                                                                                                                                                                                                                                                                                                                                                                                                                                                                                                                                                                                                                                                                                                                                                                                                                                                                                                                                                                                                                                                                                                                                                                                                                                                                                                                                                                                                                                                                   |
| Sample No 2        |              | Consensus Sequence of Strain DKS (1465 bp)                                                                                                                                                                                                                                                                                                                                                                                                                                                                                                                                                                                                                                                                                                                                                                                                                                                                                                                                                                                                                                                                                                                                                                                                                                                                                                                                                                                                                                                                                                                                        |
| Sample location    | Dakshineswar | TGCTCAGATTGAACGCTGGCGGACGGCCTAACACATGCAAGTCGAGCGGATGAGAGGAGCTTGCTCCTCGATTACG<br>GGCGGACGGGTGAGTAATGCCTAGGAATCTGCCTGGTAGTGGGGGACAACGTTTCGAAAGGAACGCTAATACCGCA<br>TACGCTCTACGGGAGAAAGCAGGGGACCTTCGGGCCTTGCGCTATCAGATGAGCCTAGGTCGGATTAGCTAGTTGGT<br>GAGGTAATGGCTACCAAGGCGACGATCCGTAAGTGGTCTGAGAGGATGATCAGTCACACTGGAAGTGCAGACGGT<br>CCAGACTCTACGGGAGGCAGCAGTGGGGAATATTGGACAATGGGCGAAAGCCTGATCCAGCCATGCCGCGTGTGT<br>GAAGAAGGTCTTCGGATTGTAAAGCACTTTAAGTTGGGAGGAAGGCGAGTAAGCTAATACCTTGCTGTTTGACGTTA<br>CCGACAGAATAAGCACCGGCTAAGTTCGTGCCAGCAGCCGCGTAATACGAAGGGTGCAAGCGTTAATCGGAATTAC<br>TGGGCGTAAAGCGCGGTAGGTGGTTGTTAAGTTGGATGTGAAAGCCCCGGGCTCAACCTGGGAAGTGCATCCAA<br>ACTGGCGAGCTAGAGTATGGCAGAGGGTGGTGGAATTTCTGTGAGCGGTGAAATGCGTAGATATAGGAAGGAAC<br>ACCAGTGGCGAAGGCGACCACTGGGCTAATACTGACACTGAGGTGCGAAAGCGTGGGGAGCAAACAGGATTAGAT<br>ACCCTGGTAGTCCACGCGTAAACGATGTGCTAGTACCGGTTGGGATCCTTGAGATCTTAGTGCGCAGCTAACGCATT<br>AAGTCGACCGCTGGGGAGTACGGCCGCAAGGTTAAACTCAAATGAATTGACGGGGGCCGCAACGCGGTGGAG<br>CATGTGGTTAATTGAAGCAACGCGAAGAACCTTACCAGGCCTTGACATGCAGAGAAGTTCCAGAGATGGATCGGT<br>GCCTTCGGGAAGTCTGACACAGGTGCTGCATGGCTGTCGTAGCTGCTGTGCTGAGATGTTGGGTTAAGTCCCGTAAC<br>GAGCGCAACCTTGTCTTAGTTACCAGCAGCTTAAGGTGGGCACTTAAGGAGACTGCCGCTGACAAACCGGAGGA<br>AGGTGGGGATGACGTCAAGTCATCATGGCCCTTACGGCCTGGGCTACACAGTGCTACAATGGTGGTACAAAGGT<br>TGCCAAGCCGCGAGGTGGAGCTAATCCATAAAACCGATCGTAGTCCGGATCGCAGTCTGCAACTCGACTGCGTGAA<br>GTCGGAATCGCTAGTAATCGTGAATCAGAATGTACGGTGAATACGTTCCCGGGCCTTGACACACCGCCCGTCACAC<br>CATGGGAGTGGGTTGCTCCAGAAGTAGTAGTCTAACCTTCGGGGGACGGTTACCACGGAGTGATTGACTGAGG<br>GG               |
| Sample code        | DKS          |                                                                                                                                                                                                                                                                                                                                                                                                                                                                                                                                                                                                                                                                                                                                                                                                                                                                                                                                                                                                                                                                                                                                                                                                                                                                                                                                                                                                                                                                                                                                                                                   |
| Sample description | River        |                                                                                                                                                                                                                                                                                                                                                                                                                                                                                                                                                                                                                                                                                                                                                                                                                                                                                                                                                                                                                                                                                                                                                                                                                                                                                                                                                                                                                                                                                                                                                                                   |
| NCBI Accession No. | ON834475     |                                                                                                                                                                                                                                                                                                                                                                                                                                                                                                                                                                                                                                                                                                                                                                                                                                                                                                                                                                                                                                                                                                                                                                                                                                                                                                                                                                                                                                                                                                                                                                                   |
| Sample No 3        |              | Consensus Sequence of Strain GS1 (1487 bp)                                                                                                                                                                                                                                                                                                                                                                                                                                                                                                                                                                                                                                                                                                                                                                                                                                                                                                                                                                                                                                                                                                                                                                                                                                                                                                                                                                                                                                                                                                                                        |
| Sample location    | Gangasagar   | CAGCTCAGGACGACGCGCGGCGTGCCTAATACGTGCAAGTCGAGCGCAGGAATCATCCGAACCTTTTCGGGGGGA<br>CGTTGATGGATGAGCGGCGGACGGGTGAGTAACACGTAAGAAACCTGCCCTCAGGTGTGGGATAACACAGAGAAAT<br>CGGGGCTAATACGGGATGGGTATCGGACCGCATGGTCCGAGGATGAAGGCGCTTGGGCGTCGCTGGGGATGGCT<br>TGCGGTGCATAAGCTAGTTGGTGGGTAATGGCCACCAAGGCGACGATGCATAGCCGACTTGAGAGGGTGATCGG<br>CCACACTGGGATTGAGACACGCGCCAGATTCTACGGGAGGCAGCAGTAGGGAATCTTCCACAATGGACGAAAGTCT<br>GATGGAGCAACGCCGCTGAACGATGAAGGCTTTCGGGTGCTAAAGTTCTGTTGTAAGGGAAGAACAAGTCCGCA<br>GGCAATGGCGGCACCTTGACGGTACCTTGCGAGAAAGCCACGGCTAACTACGTGCCAGCAGCCGCGTAATACGTAG<br>GTGGCAAGCGTTGTCGGGAATTATTGGGCGTAAAGCGCGCGCAGGCGGCTCTTAAGTCTGATGTGAAAGCCCCCGG<br>CTCAACCGGGGAGGGCCATTGGAAGTGGGAGGCTTGAATATAGGAGAGAAGAGTGGAAATCCACGTGATAGCGGTG<br>AAATGCGTAGAGATGTGGAGGAACACCAAGTGGCGAAGGCGACTTTTGGCTATAACTGACGCTGAGGCGCGAAAG<br>CGTGGGGAGCAAACAGGATTAGATACCCTGGTAGTCCACGCGTAAACGATGAGTGTAGGTGTTGGAGGGTTTCCG<br>CCCTTCAGTGCTGAAGCTAACGCATTAAGCACTCCGCTGGGAGTACGGTCGCAAGGCTGAAACTCAAAGGAATTG<br>ACGGGGACCCGCAAGCGGTGGAGCATGTGGTTAATTGCAAGCAACGCGAAGAACCTTACCAACTCTTGACATCC<br>CCCTGACCGGTACAGAGATGTACCTTCCCTTCGGGGGCAAGGGTGACAGGTGGTGCATGTTGTCGTAGCTCGT<br>TCGTGAGATGTTGGGTTAAGTCCCGCAACGAGCGCAACCTTGTCTTAGTTGCCACCAATTCATTGGGCACTCAAGG<br>AGACTGCCGTGACAAACCGGAAGAGGTGGGGATGACGTCAAATCATATGCCCCCTTAGGATTGGGCTACACACG<br>TGCTACAATGGACAGTACAAAGGGCAGCGAACCCGAGGTGGAGCCTATCCAGAAAGCCGTTCTCAGTTGAGATTG<br>CACGCTGCAACTCGCTGCATGAAGTCGGAATCGTAGTAATCGCATGTCAACATACTGCGGTGAATACGTTCCCGGG<br>TCTTGACACACCGCCGCTACACACGAGAGTTGTAACCCGAACTCTGTGAGGTAACCTTAGGGAGCCAGCCGC<br>CAAAGGTGGAGACAGATGATTGG |
| Sample code        | GS1          |                                                                                                                                                                                                                                                                                                                                                                                                                                                                                                                                                                                                                                                                                                                                                                                                                                                                                                                                                                                                                                                                                                                                                                                                                                                                                                                                                                                                                                                                                                                                                                                   |
| Sample description | Estuary      |                                                                                                                                                                                                                                                                                                                                                                                                                                                                                                                                                                                                                                                                                                                                                                                                                                                                                                                                                                                                                                                                                                                                                                                                                                                                                                                                                                                                                                                                                                                                                                                   |
| NCBI Accession No. | ON834476     |                                                                                                                                                                                                                                                                                                                                                                                                                                                                                                                                                                                                                                                                                                                                                                                                                                                                                                                                                                                                                                                                                                                                                                                                                                                                                                                                                                                                                                                                                                                                                                                   |

**Supplementary Table S2:**

|        | Zooplankton<br>abundance | BP 10-5<br>CFUml-<br>l | Chl-a<br>mgL-1 | EC<br>μSCm-<br>l | Salinity<br>(psu) | TH<br>mgL-<br>l | TDS<br>mgL-1 | Ca++mgL-<br>l | Na+mgL-<br>l | K+mgL <sup>-1</sup> | Nitrate<br>mgL <sup>-1</sup> | Phosphate<br>mgL <sup>-1</sup> | DO<br>mgL-<br>l | pH   | Temp<br>°C |
|--------|--------------------------|------------------------|----------------|------------------|-------------------|-----------------|--------------|---------------|--------------|---------------------|------------------------------|--------------------------------|-----------------|------|------------|
| BRKO17 | 9.8                      | 0.36                   | 83.4           | 288              | 0.12              | 240             | 120          | 5.79          | 9.59         | 3                   | 7                            | 0.0165                         | 7.9             | 8.6  | 27         |
| BRKF18 | 425.2                    | 0.06                   | 41.7           | 488              | 0.42              | 270             | 234          | 4.64          | 3.57         | 4.02                | 6                            | 0.023                          | 6.9             | 8.5  | 26         |
| BRKJ18 | 5.4                      | 0.9                    | 29.9           | 347              | 0.22              | 112             | 192          | 2.46          | 4.2          | 3.22                | 7                            | 0.024                          | 6.8             | 7.89 | 27         |
| DKSO17 | 14.6                     | 0.9                    | 74.53875       | 325              | 0.14              | 204             | 149          | 6.21          | 14.19        | 3.84                | 9                            | 0.0169                         | 7.8             | 7.9  | 28         |
| DKSF18 | 241.4                    | 0.6                    | 29.19          | 624              | 0.45              | 270             | 312          | 4.51          | 8.15         | 4.07                | 9                            | 0.0179                         | 6.5             | 8.8  | 26         |
| DKSJ18 | 48.8                     | 1.7                    | 44.19          | 221              | 0.24              | 180             | 126          | 2.87          | 7.5          | 3.26                | 10                           | 0.105                          | 6               | 7.38 | 26         |
| KDMO17 | 13                       | 0.67                   | 79.75125       | 304              | 0.13              | 292             | 130          | 12.26         | 11.21        | 3.17                | 7                            | 0.0187                         | 7.6             | 8    | 29         |
| KDMF18 | 55.6                     | 0.32                   | 52.125         | 614              | 0.45              | 298             | 306          | 4.4           | 7.7          | 4.12                | 7                            | 0.0146                         | 6.5             | 8.9  | 26         |
| KDMJ18 | 380                      | 1.3                    | 41.83          | 222              | 0.23              | 100             | 125          | 2.52          | 6.2          | 3.1                 | 7                            | 0.047                          | 6.2             | 7.5  | 26         |
| KDPO17 | 17.4                     | 7                      | 125.6213       | 8780             | 4.32              | 1856            | 4728         | 24.1          | 223.06       | 49.57               | 20                           | 0.0318                         | 7.8             | 9    | 28         |
| KDPF18 | 20.4                     | 0.35                   | 125.1          | 17800            | 10.64             | 1780            | 8879         | 57.88         | 1237.77      | 412.59              | 20                           | 0.044                          | 7.5             | 9    | 26         |
| KDPJ18 | 3.4                      | 9                      | 142.34         | 20400            | 5.3               | 2760            | 11200        | 49.63         | 108.84       | 100.98              | 25                           | 0.082                          | 6.8             | 7.98 | 26         |
| KCBO17 | 13.8                     | 11                     | 219.9675       | 12450            | 6.29              | 1940            | 6327         | 31.83         | 301.72       | 67.05               | 30                           | 0.0633                         | 7.8             | 9.1  | 28         |
| KCBF18 | 135.8                    | 9                      | 131.355        | 32200            | 17.79             | 1820            | 15990        | 57.28         | 1652.94      | 550.98              | 25                           | 0.1016                         | 7.9             | 9.2  | 27         |
| KCBJ18 | 2.6                      | 16                     | 143.68         | 23670            | 9.25              | 7380            | 13500        | 54.42         | 108.84       | 100.98              | 35                           | 0.115                          | 6.8             | 8.9  | 28         |
| GSO17  | 23.8                     | 250                    | 105.2925       | 24400            | 13.09             | 2250            | 12500        | 43.61         | 516.1        | 114.69              | 40                           | 0.2444                         | 8.2             | 9.2  | 29         |
| GSF18  | 43.2                     | 160                    | 135.525        | 43300            | 24.6              | 2180            | 21550        | 66.45         | 1886.94      | 628.98              | 32                           | 0.1221                         | 8               | 9.4  | 28         |
| GSJ18  | 10.2                     | 300                    | 150.57         | 30670            | 15.09             | 5200            | 17680        | 63.92         | 108.84       | 100.98              | 39                           | 0.135                          | 6.9             | 9.1  | 29         |

**Supplementary Table S3:**

| <b>Phytoplankton species</b>       | <b>BRK</b> | <b>DKS</b> | <b>KDM</b> | <b>KDP</b> | <b>KCB</b> | <b>GS</b> |
|------------------------------------|------------|------------|------------|------------|------------|-----------|
| <i>Pediastrum</i>                  | +          | +          | +          | +          | +          | -         |
| <i>Spirogyra</i>                   | +          | +          | +          | +          | -          | -         |
| <i>Anabaena</i>                    | +          | +          | +          | -          | -          | -         |
| <i>Volvox</i>                      | +          | +          | +          | -          | -          | -         |
| <i>Oedogonium undulatum</i>        | +          | +          | +          | -          | -          | -         |
| <i>Oscillatoria</i> sp.            | +          | +          | +          | +          | -          | -         |
| <i>Spirulina</i>                   | +          | +          | +          | -          | -          | -         |
| <i>Microcystis aeruginosa</i>      | +          | +          | +          | +          | -          | -         |
| <i>Merismopedia tenuissima</i>     | +          | +          | +          | -          | -          | -         |
| <i>A. granulata</i>                | +          | +          | +          | -          | -          | -         |
| <i>Fragilaria vaucheriae</i>       | +          | +          | +          | -          | -          | -         |
| <i>Leptocylindrus danicus</i>      | +          | +          | +          | -          | -          | -         |
| <i>Thalassionema nitzschioides</i> | +          | +          | +          | +          | +          | +         |
| <i>Odontella aurita</i>            | -          | -          | -          | +          | +          | +         |
| <i>Paralia sulcata</i>             | -          | -          | -          | +          | +          | +         |
| <i>Pleurosigma formosum</i>        | -          | -          | -          | +          | +          | +         |
| <i>Skeletonema costatum</i>        | -          | -          | -          | -          | +          | +         |
| <i>Asterionellopsis glacialis</i>  | -          | -          | -          | -          | +          | +         |
| <i>Bellerochea malleus</i>         | -          | -          | -          | -          | +          | +         |
| <i>Thalassiosira decipiens</i>     | -          | -          | -          | -          | +          | +         |
| <i>Coscinodiscus granii</i>        | -          | -          | -          | -          | -          | +         |
| <i>C. radiatus</i>                 | -          | -          | -          | -          | -          | +         |
| <i>Gyrosigma scalproides</i>       | -          | -          | -          | -          | -          | +         |
| <i>Biddulphia rhombus</i>          | -          | -          | -          | -          | -          | +         |
| <i>Biddulphia sinensis</i>         | -          | -          | -          | -          | -          | +         |
| <i>Coscinodiscus lineatus</i>      | -          | -          | -          | -          | -          | +         |
| <i>Chaetoceros lorenzianus</i>     | -          | -          | -          | -          | +          | +         |
| <i>Thalassiothrix frauenfeldii</i> | -          | -          | -          | -          | -          | +         |

**Supplementary Table S4:**

| <b>Zooplankton taxa</b>           | <b>BRK</b> | <b>DKS</b> | <b>KDM</b> | <b>KDP</b> | <b>KCB</b> | <b>GS</b> |
|-----------------------------------|------------|------------|------------|------------|------------|-----------|
| <b>Rotifera</b>                   |            |            |            |            |            |           |
| <i>Adineta ricciae</i>            | +          | -          | -          | -          | -          | -         |
| <i>Anuraeopsis fissa</i>          | +          | -          | -          | -          | -          | -         |
| <i>Brachionus angularis</i>       | +          | -          | +          | -          | -          | -         |
| <i>Brachionus calyciflorus</i>    | +          | -          | -          | -          | -          | -         |
| <i>Brachionus forficula</i>       | +          | -          | -          | -          | -          | -         |
| <i>Rotatoria</i>                  | +          | +          | -          | -          | -          | -         |
| <i>Lecane luna</i>                | +          | -          | -          | -          | -          | -         |
| <i>Filinia opoliensis</i>         | +          | -          | -          | -          | -          | -         |
| <i>Filinia longiseta</i>          | -          | -          | +          | -          | -          | -         |
| <i>Keratella tropica</i>          | +          | +          | +          | -          | -          | -         |
| <i>Keratella cochlearis</i>       | -          | +          | +          | -          | -          | -         |
| <i>Platyias quadricornis</i>      | +          | -          | -          | -          | -          | -         |
| <i>Platyias patulus</i>           | -          | +          | -          | -          | -          | -         |
| <i>Polyarthra vulgaris</i>        | -          | +          | +          | -          | -          | -         |
| <i>Hexarthra</i>                  | -          | -          | +          | -          | -          | -         |
| <b>Cladocera</b>                  |            |            |            |            |            |           |
| <i>Bosmina longispina</i>         | +          | +          | +          | -          | -          | -         |
| <i>Moina sp.</i>                  | +          | +          | +          | -          | -          | -         |
| <b>Copepoda</b>                   |            |            |            |            |            |           |
| <i>Acartiella sewelli</i>         | +          | +          | +          | +          | +          | +         |
| <i>Mesocyclops leuckarti</i>      | +          | +          | +          | +          | +          | +         |
| <i>Macrosetella gracilis</i>      | +          | +          | +          | +          | +          | -         |
| <i>Paracalanus sp.</i>            | -          | -          | -          | -          | +          | +         |
| <i>Eucalanus sp.</i>              | -          | -          | -          | +          | +          | +         |
| <i>Pseudodiaptomus annandalei</i> | -          | -          | -          | +          | +          | +         |
| <i>Acartia sp.</i>                | -          | -          | -          | +          | +          | +         |
| <i>Harpacticus sp.</i>            | -          | -          | -          | -          | +          | +         |
| <i>Halicyclops tenuispina</i>     | -          | -          | -          | +          | +          | +         |
| <i>Pontella andersoni</i>         | -          | -          | -          | +          | +          | +         |
| <i>Eucalanus subcrassus</i>       | -          | -          | -          | +          | +          | +         |
| <i>Euchaeta marina</i>            | -          | -          | -          | +          | +          | +         |
| <i>Euterpina acutifrons</i>       | -          | -          | -          | +          | +          | +         |
| <i>Temora turbinata</i>           | -          | -          | -          | +          | +          | +         |
| <i>Tortanus gracilis</i>          | -          | -          | -          | +          | +          | +         |
| <i>Corycaeus catus</i>            | -          | -          | -          | +          | +          | +         |
| <i>Canthocalanus pauper</i>       | -          | -          | -          | +          | +          | +         |
| <i>Halicyclops tenuispina</i>     | -          | -          | -          | +          | +          | +         |
| <i>Acrocalanus sp.</i>            | -          | -          | -          | -          | -          | +         |

**Supplementary Table S5**

| Phylum     | Subphylum | Order/Group | Genus/ species                 | Feeding mode                        | References                                                                     |
|------------|-----------|-------------|--------------------------------|-------------------------------------|--------------------------------------------------------------------------------|
| Rotifera   |           | Ploima      | <i>Adineta ricciae</i>         | Bacterivory                         | Leasi and Ricci, 2010                                                          |
|            |           |             | <i>Anuraeopsis fissa</i>       | Bacterivory, Detritivory            | Ooms-Wilms et al.,1995; Pourriot, 1977                                         |
|            |           |             | <i>Brachionus angularis</i>    | Bacterivory, Herbivory              | Kumar and Rao, 2001; Ooms-Wilms et al.,1995                                    |
|            |           |             | <i>Brachionus calyciflorus</i> | Bacterivory,Herbivory               | Kumar and Rao, 2001; Rothhaupt, 1990; Starkweather et al.,1979                 |
|            |           |             | <i>Brachionus forficula</i>    | Herbivory                           | Kim et al., 2000                                                               |
|            |           |             | <i>Rotatoria</i>               | Bacterivory, Herbivory, Detritivory | Ooms-Wilms et al.,1995;Bogdan and Gilbert 1982; Glime, 2013                    |
|            |           |             | <i>Lecane luna</i>             | Bacterivory                         | Ooms-Wilms et al.,1995                                                         |
|            |           |             | <i>Filinia opoliensis</i>      | Bacterivory                         | Glime, 2013                                                                    |
|            |           |             | <i>Filinia longiseta</i>       | Bacterivory, Herbivory, Detritivory | Glime 2013Ooms-Wilms et al.,1995; Koste,1978                                   |
|            |           |             | <i>Keratella tropica</i>       | Bacterivory, Herbivory, Detritivory | Ooms-Wilms et al.,1995<br>Marce et al., 2005                                   |
|            |           |             | <i>Keratella cochlearis</i>    | Bacterivory, Herbivory, Detritivory | Ooms-Wilms et al.,1995; Marce et al. 2005                                      |
|            |           |             | <i>Platylabus quadricornis</i> | Herbivory                           | Sarma and Nandini, 2002                                                        |
|            |           |             | <i>Platylabus patulus</i>      | Herbivory                           | Fulton and Paerl, 1987                                                         |
|            |           |             | <i>Polyarthra vulgaris</i>     | Bacterivory, Herbivory, Detritivory | Bogdan and Gilbert, 1982; Glime, 2013                                          |
|            |           |             | <i>Hexarthra</i>               | Herbivory                           | Kim et al., 2000                                                               |
| Arthropoda | Crustacea | Cladocera   | <i>Bosmina longispina</i>      | Bacterivory, Herbivory, Detritivory | DeMott and Kerfoot, 1982; Kim et al., 2000                                     |
|            |           |             | <i>Moina</i>                   | Bacterivory, Herbivory, Detritivory | Kim et al., 2000                                                               |
|            |           | Copepoda    | Cyclopoida                     | Omnivory                            | Kumar and Rao, 1999; Burke 1977; Kleppel, 1993; Adrian and Frost, 1992         |
|            |           |             | Calanoida                      | Omnivory                            | Paffenhöfer et al., 1982; Burke, 1977; DeMott, 1989; Bhattacharya et al., 2014 |
|            |           |             | Harpacticoida                  | Omnivory                            | Seifried and Dürbaum, (2000); Turner et al., 2001                              |

**Supplementary Table S6:** Pairwise Pearson correlation matrix between total zooplankton, major groups (Rotifera, Copepoda, Cladocera), with biotic (bacterial density, Chl *a*) and abiotic parameters (pH, EC, temperature, salinity, DO, total hardness, nitrate, phosphate, potassium, sodium and calcium).

|                                           | Rotifera | Copepoda | Cladocera | Zooplankton<br>Abundance<br>L <sup>-1</sup> | Bacterial<br>density<br>CFU ml <sup>-1</sup> | Chl-a<br>mg L <sup>-1</sup> |
|-------------------------------------------|----------|----------|-----------|---------------------------------------------|----------------------------------------------|-----------------------------|
| Rotifera                                  | 1        |          |           |                                             |                                              |                             |
| Copepoda                                  | 0.006    | 1        |           |                                             |                                              |                             |
| Cladocera                                 | 0.009    | 0.67     | 1         |                                             |                                              |                             |
| Zooplankton<br>Abundance L <sup>-1</sup>  | 0.01     | 0.99     | 0.73      | 1                                           |                                              |                             |
| Bacterial density<br>CFU ml <sup>-1</sup> | -0.37*   | -0.2     | -0.17     | -0.21                                       | 1                                            |                             |
| Chl-a mg L <sup>-1</sup>                  | -0.6***  | -0.4*    | -0.43*    | -0.48*                                      | 0.31                                         | 1                           |
| pH                                        | -0.58**  | -0.21    | -0.002    | -0.2                                        | 0.45*                                        | 0.58**                      |
| EC µS Cm <sup>-1</sup>                    | -0.68*** | -0.27    | -0.31     | -0.29                                       | 0.63***                                      | 0.68***                     |
| Temp °C                                   | -0.15    | -0.49    | -0.39     | -0.5                                        | 0.6***                                       | 0.48*                       |
| Salinity PSU                              | -0.63*** | -0.22    | -0.29     | -0.24                                       | 0.64***                                      | 0.61                        |
| DO mg L <sup>-1</sup>                     | -0.1     | -0.39    | -0.28     | -0.39                                       | 0.25                                         | 0.5**                       |
| TH mg L <sup>-1</sup>                     | -0.58    | -0.34    | -0.26     | -0.35                                       | 0.45                                         | 0.65***                     |
| TDS mg L <sup>-1</sup>                    | -0.68*** | -0.28    | -0.32     | -0.3                                        | 0.65***                                      | 0.6***                      |
| Nitrate mg L <sup>-1</sup>                | -0.72*** | -0.38    | -0.35     | -0.4*                                       | 0.71***                                      | 0.79***                     |
| Phosphate mg L <sup>-1</sup>              | -0.538** | -0.21    | -0.28     | -0.23                                       | 0.76***                                      | 0.4*                        |
| K+ mg L <sup>-1</sup>                     | -0.483   | -0.1     | -0.22     | -0.12                                       | 0.24                                         | 0.43*                       |
| Na+ mg L <sup>-1</sup>                    | -0.45    | -0.08    | -0.22     | -0.1                                        | 0.23                                         | 0.41*                       |
| Ca++                                      | -0.73*** | -0.35    | -0.35     | -0.37                                       | 0.55**                                       | 0.76***                     |

\*P<0.1

\*\*P<0.05

\*\*\*P<0.
